# Supplementary material for: Phylogeny and systematics of the colubrid snake genera Liopeltis and Gongylosoma (Squamata: Colubridae) and description of a new Himalayan endemic genus and species
Source: PubMed Central journal article supplement (PMC11494134; doi:10.1038/s41598-024-74271-1), 2024-10-21

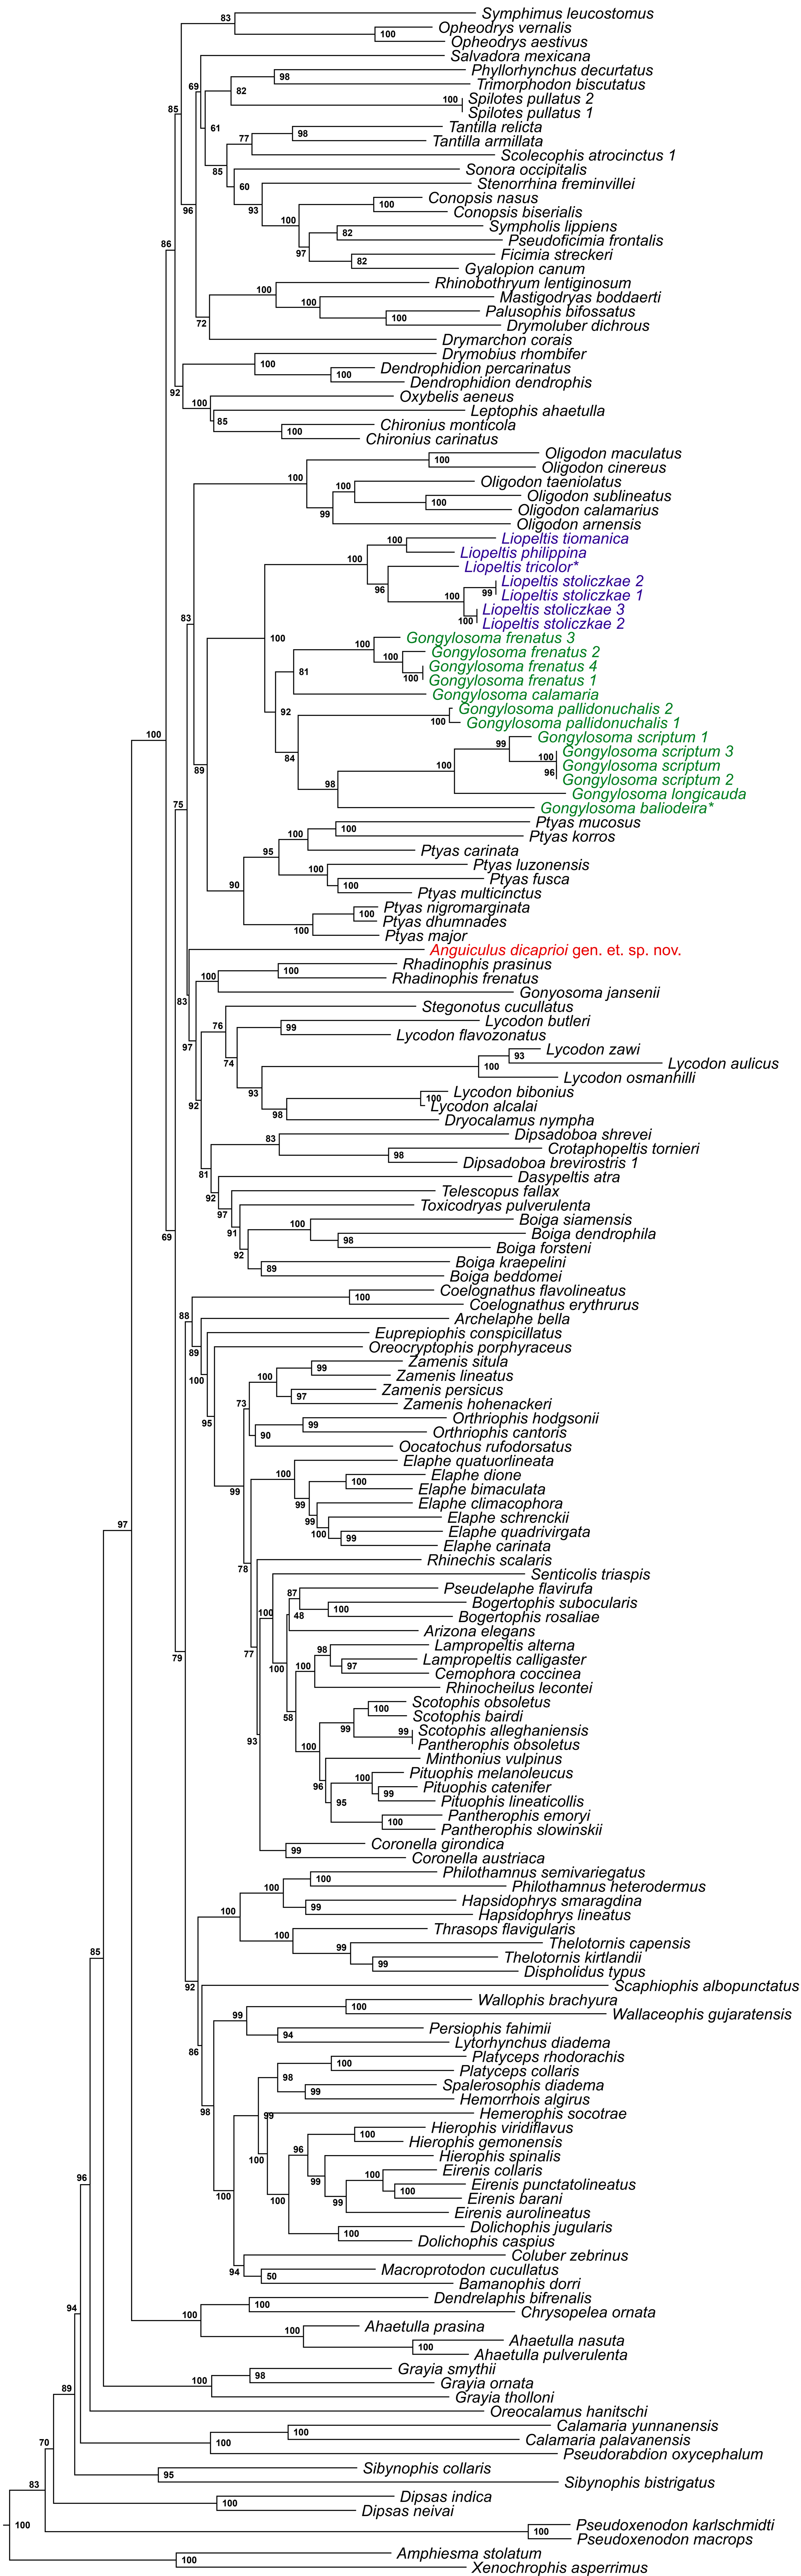

Supplement: 41598_2024_74271_MOESM6_ESM.pdf [file 41598_2024_74271_MOESM6_ESM.pdf]
